# Supplementary material for: CDP7657, an anti-CD40L antibody lacking an Fc domain, inhibits CD40L-dependent immune responses without thrombotic complications: an in vivo study
Source: PubMed Central journal article supplement (PMC4558773; doi:10.1186/s13075-015-0757-4), 2015-09-03
Supplement: 13075_2015_757_MOESM3_ESM.pdf [file 13075_2015_757_MOESM3_ESM.pdf]

**CDP7657 IC and aglycosyl hu5c8 IC do not induce platelet aggregation in rhesus monkey platelets both in the absence or presence of sub-aggregatory amounts of the platelet agonist (ADP)**

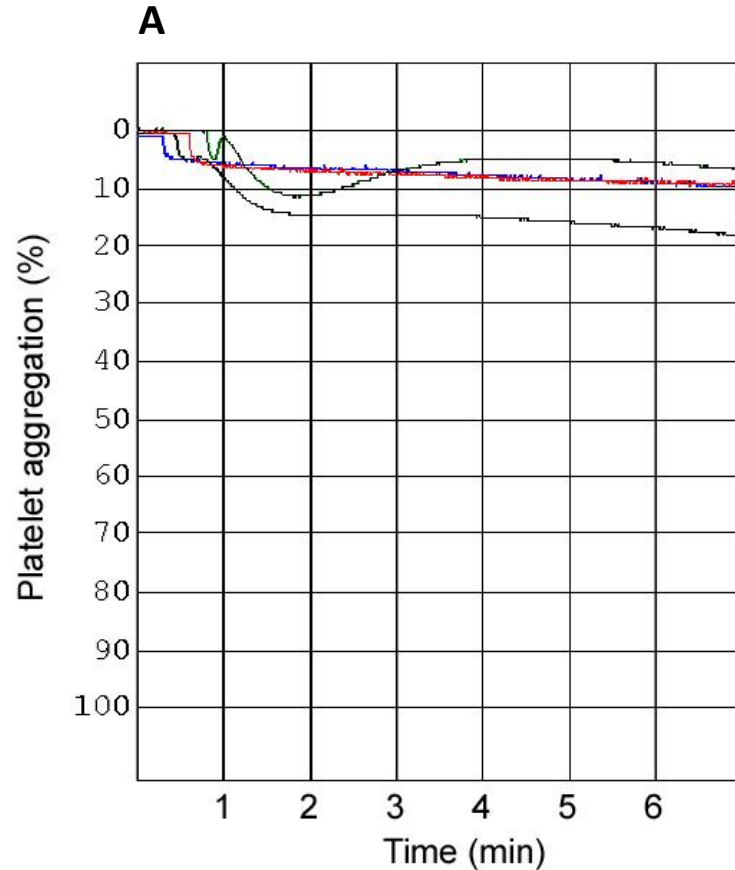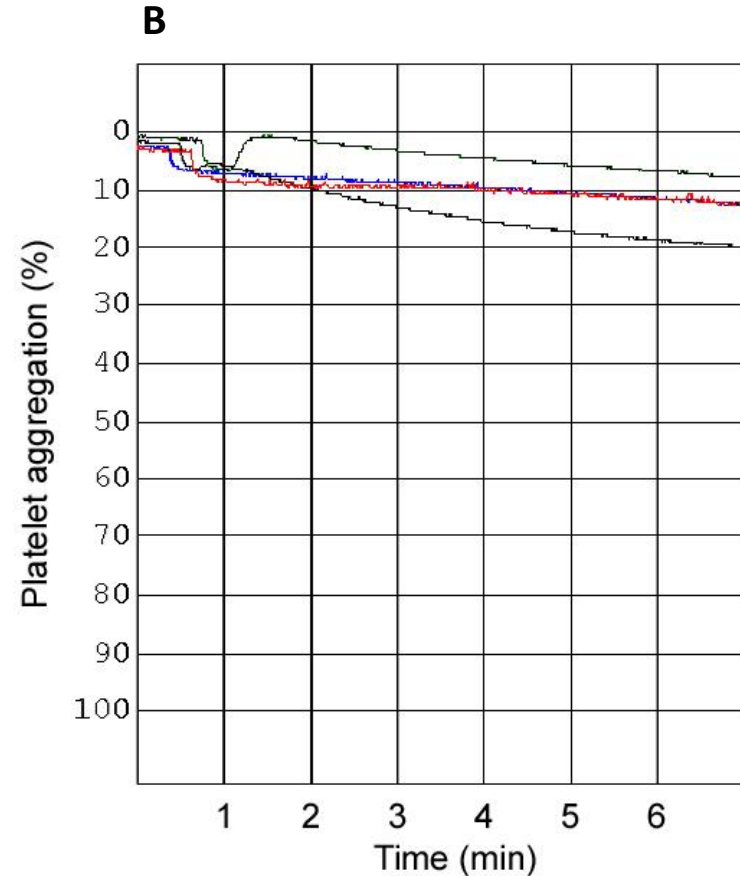

In vitro aggregation assay of rhesus monkey washed platelets. **(A)** CDP7657 IC did not aggregate rhesus monkey washed platelets in the absence (blue and red), or presence (black and green) of ADP. **(B)** Similarly, aglycosyl hu5c8 IC did not aggregate rhesus monkey washed platelets in the absence (blue and red), or presence (black and green) of ADP.
